# Supplementary material for: HLA-F and LILRB1 Genetic Polymorphisms Associated with Alloimmunisation in Sickle Cell Disease
Source: MDPI journal article supplement (doi:10.3390/ijms241713591), 2023-09-02
Supplement: s1 [file s1]

## Supplementary Tables

|                  | All patients   | Non-alloimmunized patients | Alloimmunized patients | p-value (Chi 2) |
|------------------|----------------|----------------------------|------------------------|-----------------|
| <i>HLA-G</i>     |                |                            |                        |                 |
| 01:01:01         | 26/70 (37.1%)  | 15/38 (39.5%)              | 7/18 (38.9%)           | 0.97            |
| 01:01:02         | 14/70 (20.0%)  | 7/38 (18.4%)               | 2/18 (11.1%)           | 0.49            |
| 01:04:01         | 12/70 (17.1%)  | 8/38 (21.0%)               | 3/18 (16.7%)           | 0.70            |
| 01:04:04         | 3/70 (4.3%)    | 1/38 (2.6%)                | 1/18 (5.5%)            | 0.58            |
| 01:03:01         | 5/70 (7.1%)    | 1/38 (2.6%)                | 2/18 (11.1%)           | 0.19            |
| 01:05N           | 4/70 (5.7%)    | 1/38 (2.6%)                | 2/18 (11.1%)           | 0.19            |
| others           | 6/70 (8.6%)    | 5/38 (13.2%)               | 1/18 (5.5%)            | 0.39            |
| <i>HLA-E</i>     |                |                            |                        |                 |
| 01:01:01         | 30/70 (42.8%)  | 18/38 (47.4%)              | 6/18 (33.3%)           | 0.32            |
| 01:03:01         | 18/70 (25.7%)  | 11/38 (28.9%)              | 7/18 (38.9%)           | 0.45            |
| 01:03:02         | 18/70 (25.7%)  | 9/38 (23.7%)               | 5/18 (27.8%)           | 0.74            |
| <i>HLA-F</i>     |                |                            |                        |                 |
| 01:01:01         | 54/70 (77.1 %) | 29/38 (76.3%)              | 16/18 (88.9%)          | 0.27            |
| 01:01:02         | 12/70 (17.1%)  | 7/38 (18.4%)               | 1/18 (5.5%)            | 0.20            |
| 01:03:01         | 4/70 (5.7%)    | 2/38 (5.3%)                | 1/18 (5.5%)            | 0.96            |
| rs2523393-A      | 42/70 (60.0%)  | 25/40 (62.5%)              | 7/16 (43.7)            | 0.20            |
| rs1362126-C      | 38/60 (63.3%)  | 21/32 (65.6%)              | 7/14 (50.0%)           | 0.32            |
| rs2523405-T      | 35/70 (50.0%)  | 21/40 (52.5%)              | 5/16 (31.2%)           | 0.15            |
| KIR3DS1 presence | 10/36 (27.8%)  | 14/21 (66.7%)              | 6/9 (66.7%)            | 1               |
| NKG2C deletion   | 23/72 (31.9%)  | 13/42 (30.9%)              | 5/18 (27.8%)           | 0.81            |
| LILRB1           |                |                            |                        |                 |
| rs3760860-A      | 42/72 (58.3%)  | 20/42 (47.6%)              | 13/16 (81.2%)          | 0.02            |
| rs3760861-A      | 42/72 (58.3%)  | 20/42 (47.6%)              | 13/16 (81.2%)          | 0.02            |

|            |               |               |              |      |
|------------|---------------|---------------|--------------|------|
| LILRB2     |               |               |              |      |
| rs383369-A | 46/50 (92.0%) | 27/28 (96.4%) | 9/12 (75.0%) | 0.04 |

Table S1. Allelic frequencies of the genes HLA Ib, KIR3DS1 presence, NKG2C deletion and LILRB1 and LILRB2 polymorphisms in all patients under study and according to alloimmunization in patients who received blood products. Number of alleles out of total alleles are given, as well as allelic frequencies (in brackets). P-values comparing non-alloimmunized vs. alloimmunized patients are given.

|                         | Non-alloimmunized patients | Alloimmunized patients | p-value (Chi 2) |
|-------------------------|----------------------------|------------------------|-----------------|
| RHD                     | 21                         | 9                      |                 |
| RHD*01/*01              | 15 (71.4%)                 | 8 (88.9%)              | 0.09            |
| RHD*01/*03N.01          | 1 (4.8%)                   | 0 (0%)                 | 0.53            |
| RHD*01/*08N.01          | 1 (4.8%)                   | 0 (0%)                 | 0.53            |
| RHD*01/*10.03           | 2 (9.5%)                   | 1 (11.1%)              | 0.81            |
| RHD*01/*10.05 or *05.01 | 1 (4.8%)                   | 0 (0%)                 | 0.53            |
| RHD*03N.01/*03N.01      | 1 (4.8%)                   | 0 (0%)                 | 0.53            |
| RHCE                    | 21                         | 9                      |                 |
| RHCE*01/*01             | 0 (0%)                     | 2 (22.2%)              | 0.03            |
| RHCE*01/*02             | 6 (28.6%)                  | 1 (11.1%)              | 0.30            |
| RHCE*01/*01.01          | 1 (4.8%)                   | 2 (22.2%)              | 0.14            |
| RHCE*01/*01.20.01       | 3 (14.3%)                  | 2 (22.2%)              | 0.59            |
| RHCE*01/*01.20.03       | 1 (4.8%)                   | 0 (0%)                 | 0.50            |
| RHCE*01.01/*01.20.03    | 1 (4.8%)                   | 0 (0%)                 | 0.50            |
| RHCE*01.01/*02          | 1 (4.8%)                   | 0 (0%)                 | 0.50            |
| RHCE*01.01/*03          | 0 (0%)                     | 1 (11.1%)              | 0.12            |
| RHCE*01.20.01/*01.20.03 | 1 (4.8%)                   | 0 (0%)                 | 0.50            |

|                        |           |           |      |
|------------------------|-----------|-----------|------|
| RHCE*01.20.01/*02      | 1 (4.8%)  | 0 (0%)    | 0.50 |
| RHCE*01.20.01/*03      | 0 (0%)    | 1 (11.1%) | 0.12 |
| RHCE*01/*03            | 1 (4.8%)  | 0 (0%)    | 0.50 |
| RHCE*02/*02            | 1 (4.8%)  | 0 (0%)    | 0.50 |
| RHCE*02/*03 or *01/*04 | 4 (19.0%) | 0 (0%)    | 0.16 |

Table S2. RHD and RHCE genotype according according to alloimmunization in SCD patients who received blood products. Number of genotypes out of total genotypes are given as well as their frequencies (in brackets). P-values comparing non-alloimmunized vs. alloimmunized patients are given.
